# Supplementary material
Source: Copernicus journal article supplement (doi:10.5194/hess-30-2013-2026)
Supplement: Supplementary file 1 [file hess-30-2013-2026-supplement.pdf]

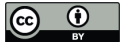

*Supplement of*

**Integrated catchment classification across China based on hydroclimatological and geomorphological similarities using self-organizing map and fuzzy  $c$ -means clustering for hydrological modeling**

Jiefan Niu et al.

*Correspondence to:* Ke Zhang (kzhang@hhu.edu.cn) and Hongjun Bao (baohongjun@cma.gov.cn)

The copyright of individual parts of the supplement might differ from the article licence.

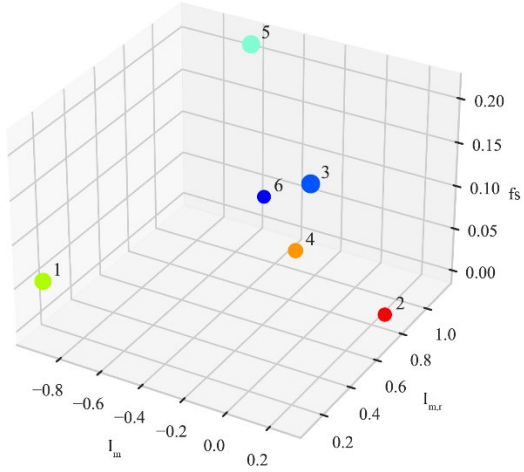

Figure S1. Climate cluster centroids in climate feature space. The three dimensions of the coordinates indicate  $I_m$ ,  $I_{m,r}$ , and  $f_s$ . Color coding correspond to  $T_m$  with the blue and red to low and high values, respectively. Marker size corresponding to  $T_{m,r}$ .

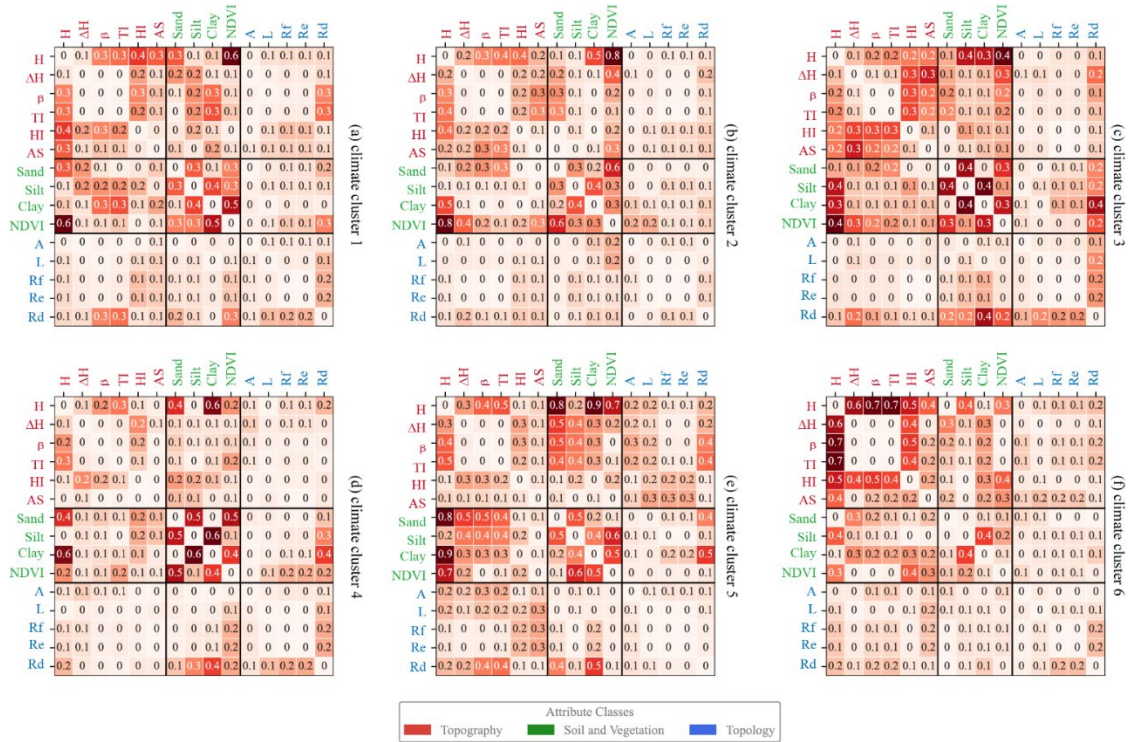

Figure S2. Absolute differences of the correlation coefficients between the climate regions and average in China.

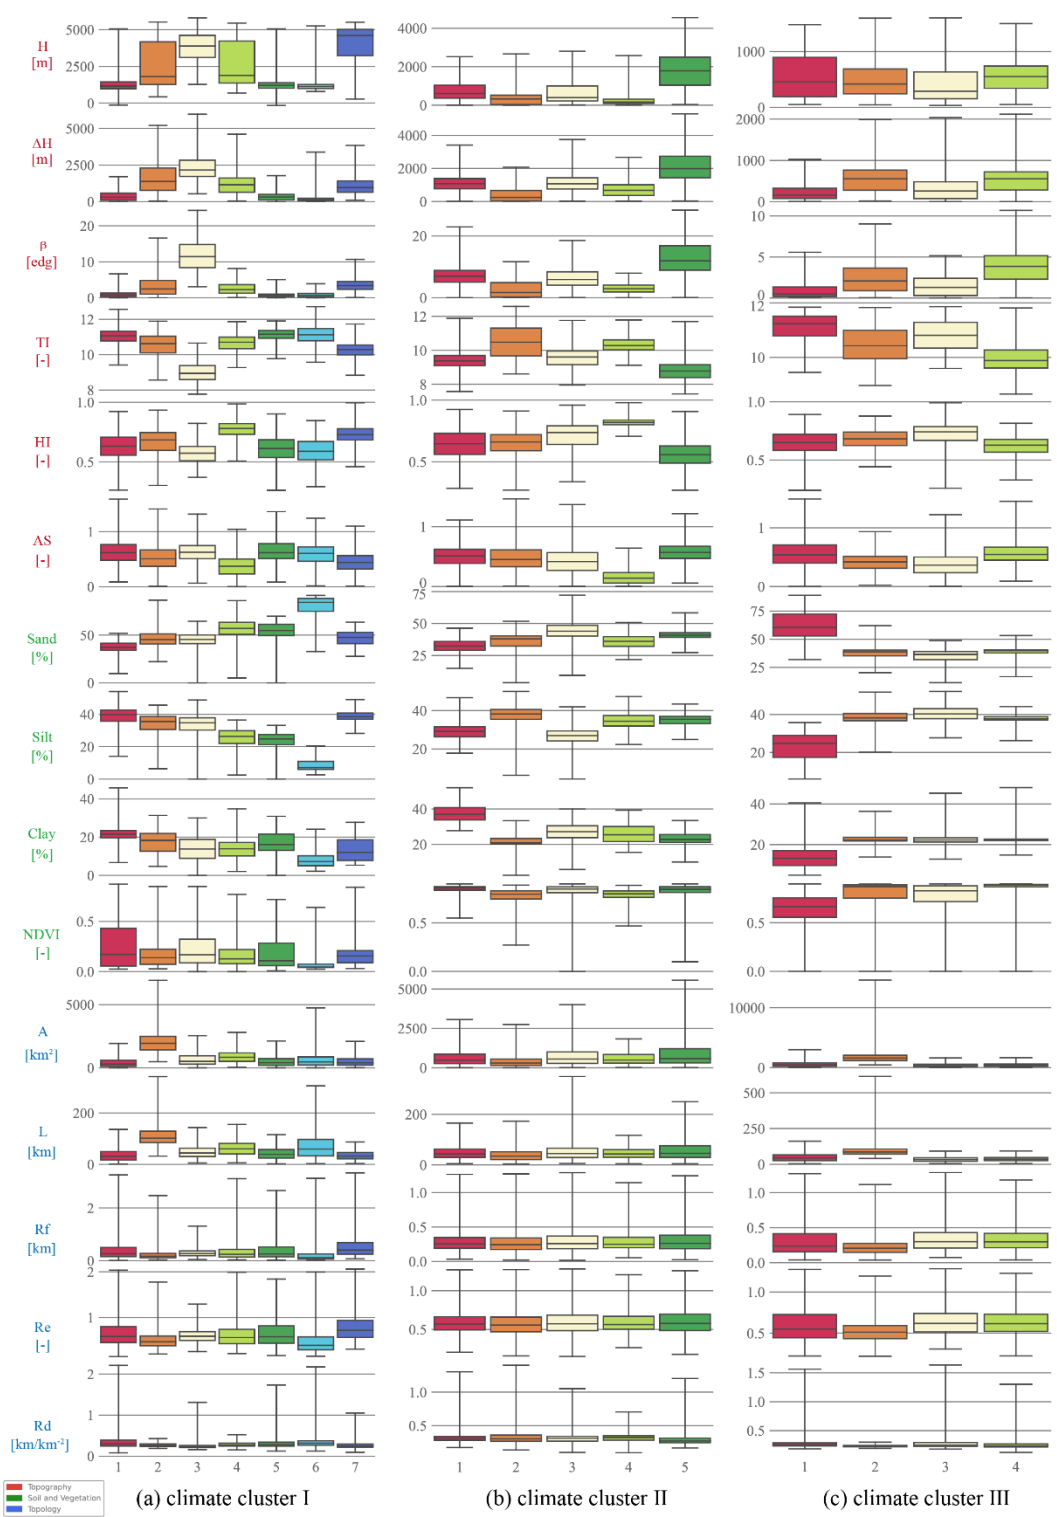

(a) climate cluster I

(b) climate cluster II

(c) climate cluster III

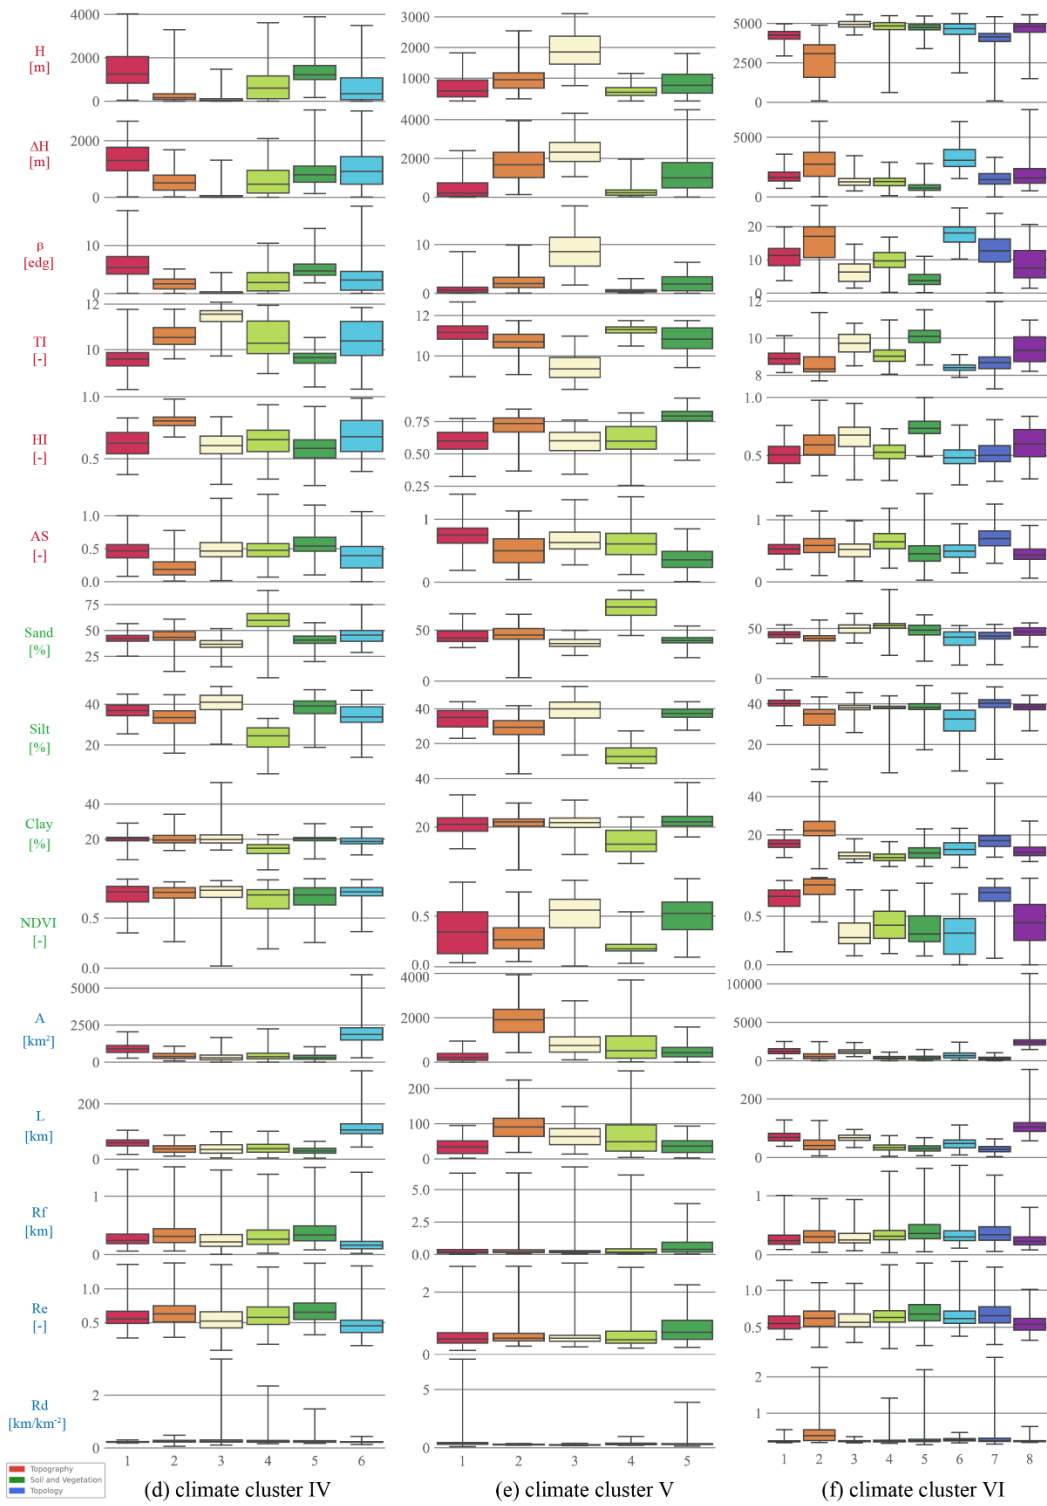

Figure S3. Catchment attribute boxplots of the clusters in different climate regions.
